# Supplementary material
Source: Research Square preprint supplement (doi:10.21203/rs.3.rs-9035742/v1)
Supplement: Supplementary file 1 [file 164cca3d4a0614dc8b2acebc.pdf]

## SUPPORTING INFORMATION

### ***α*-Glucosidase inhibitory tetraoxygenated xanthenes from the twig extract of *Garcinia cowa* Roxb. ex Choisy**

Nguyen Thi Kim An<sup>1</sup>,<sup>0000-0002-2592-4950</sup>, Nguyen Thanh Tra<sup>2</sup>,<sup>0000-0003-3351-1205</sup>, Doan Lan Phuong<sup>2</sup>,<sup>0000-0003-2514-9824</sup>, Pham Thi Tham<sup>1</sup>,<sup>0000-0001-5070-686X</sup>, Tran Thi Thu Thuy<sup>2\*</sup>,<sup>0000-0002-6770-3291</sup>

<sup>1</sup> Hanoi University of Industry, 298 Cau Dien, Hanoi 122100, Vietnam.

<sup>2</sup>Institute of Chemistry, Vietnam Academy of Science and Technology, 18 Hoang Quoc Viet, Nghia Do, Hanoi 122100, Vietnam.

\* Corresponding author: Tran Thi Thu Thuy (thuy.tran@ich.vast.vn)

#### **Abstract**

Phytochemical investigation of the twigs of *Garcinia cowa* Roxb. ex Choisy (Clusiaceae), collected in Vietnam, led to the isolation of five tetraoxygenated xanthenes, including three new compounds, namely norrubraxanthone (**1**), garcinone G (**2**), and garcinone H (**3**), together with two known compounds, *α*-mangostin (**4**) and rubraxanthone (**5**). The structures of the new compounds were elucidated by comprehensive spectroscopic analyses, including 1D and 2D NMR and high-resolution electrospray ionization mass spectrometry (HR-ESI-MS), and by comparison with literature data. All isolated compounds were evaluated for their *in vitro* *α*-glucosidase inhibitory activity. Compounds **1–5** exhibited potent inhibitory effects, with IC<sub>50</sub> values ranging from 0.39 to 1.62 μM, which were significantly stronger than that of the positive control acarbose (IC<sub>50</sub> = 263.01 ± 10.92 μM). Among them, compounds **3** and **4** showed the most pronounced activity, with IC<sub>50</sub> values of 0.43 ± 0.01 and 0.39 ± 0.01 μM, respectively.

*Keywords:* Tetraoxygenated xanthone, *Garcinia cowa*, *α*-glucosidase, antidiabetic.

## LIST OF FIGURES AND TABLE

1. Figure S1. (+)ESI-HR-MS spectrum of compound **1**
2. Figure S2.  $^1\text{H}$  NMR spectrum (in  $\text{CD}_3\text{OD}$ ) of compound **1**
3. Figure S3.  $^{13}\text{C}$  NMR spectrum (in  $\text{CD}_3\text{OD}$ ) of compound **1**
4. Figure S4. HSQC spectrum of compound **1**
5. Figure S5. HMBC spectrum of compound **1**
6. Figure S6. UV spectra of compound **1**
7. Figure S7. (+)ESI-HR-MS spectrum of compound **2**
8. Figure S8.  $^1\text{H}$  NMR spectrum (in  $\text{CD}_3\text{OD}$ ) of compound **2**
9. Figure S9.  $^{13}\text{C}$  NMR spectrum (in  $\text{CD}_3\text{OD}$ ) of compound **2**
10. Figure S10. HSQC spectrum of compound **2**
11. Figure S11. HMBC spectrum of compound **2**
12. Figure S12. UV spectra of compound **2**
13. Figure S13. (+)ESI-HR-MS spectrum of compound **3**
14. Figure S14.  $^1\text{H}$  NMR spectrum (in  $\text{CD}_3\text{OD}$ ) of compound **3**
15. Figure S15.  $^{13}\text{C}$  NMR spectrum (in  $\text{CD}_3\text{OD}$ ) of compound **3**
16. Figure S16. HMBC spectrum of compound **3**
17. Figure S17. UV spectra of compound **3**
18. Figure S18.  $^1\text{H}$  NMR spectrum (in  $\text{CD}_3\text{OD}$ ) of compound **4**
19. Figure S19.  $^{13}\text{C}$  NMR spectrum (in  $\text{CD}_3\text{OD}$ ) of compound **4**
20. Figure S20.  $^1\text{H}$  NMR spectrum (in  $\text{CD}_3\text{OD}$ ) of compound **5**
21. Figure S21.  $^{13}\text{C}$  NMR spectrum (in  $\text{CD}_3\text{OD}$ ) of compound **5**
22. Table S1.  $\alpha$ -Glucosidase inhibition effect of compounds **1-5**

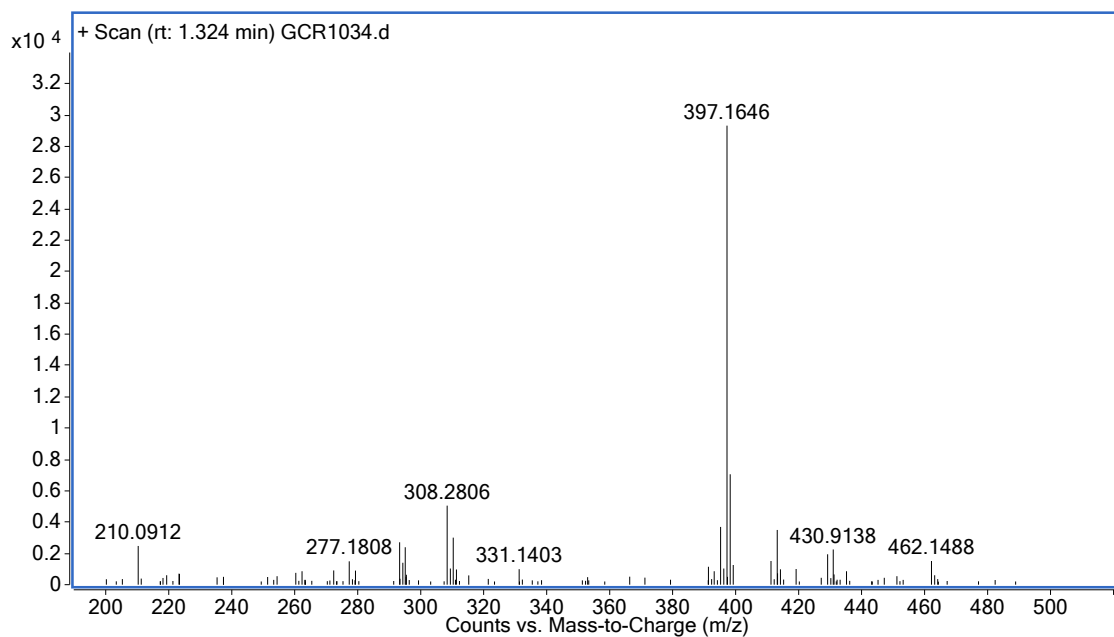

Figure S1. (+)ESI-HR-MS spectrum of compound 1.

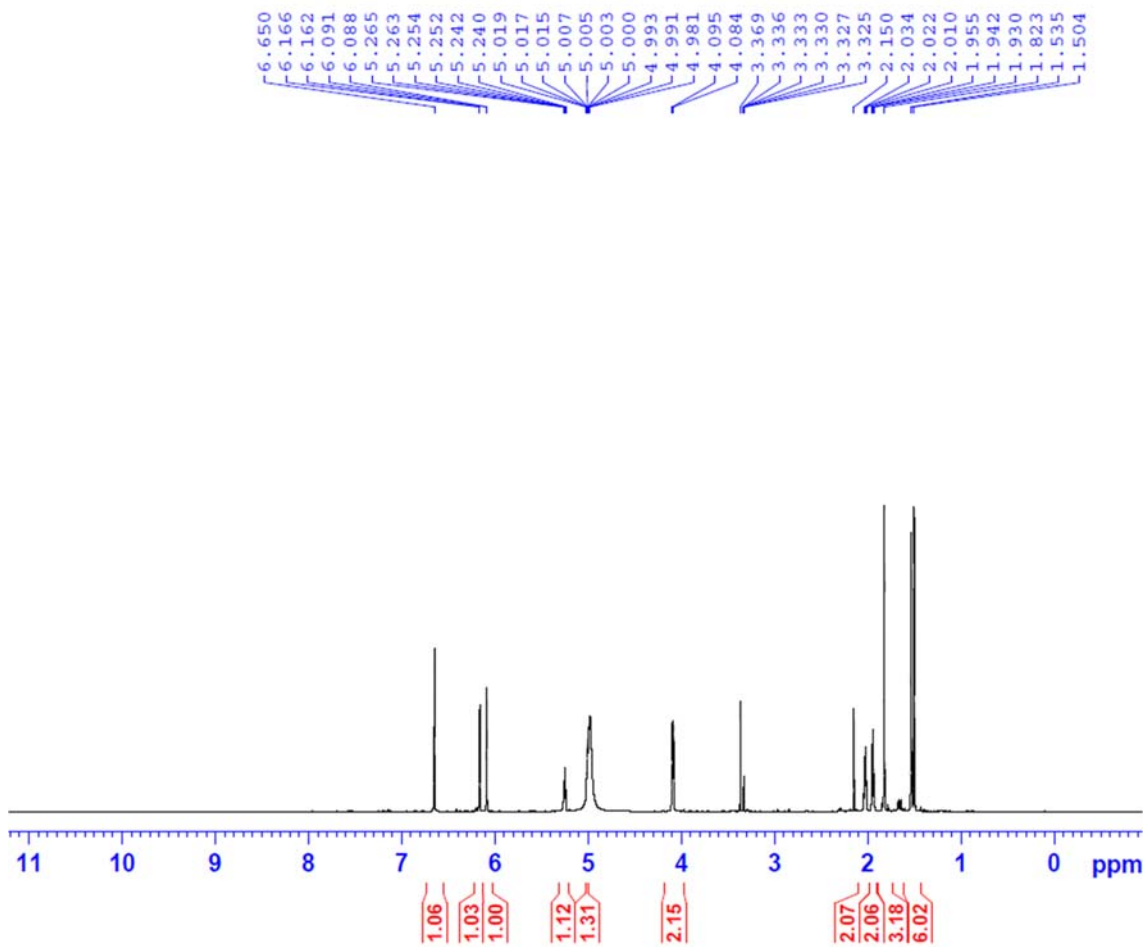

Figure S2. <sup>1</sup>H NMR spectrum (in CD<sub>3</sub>OD) of compound 1.

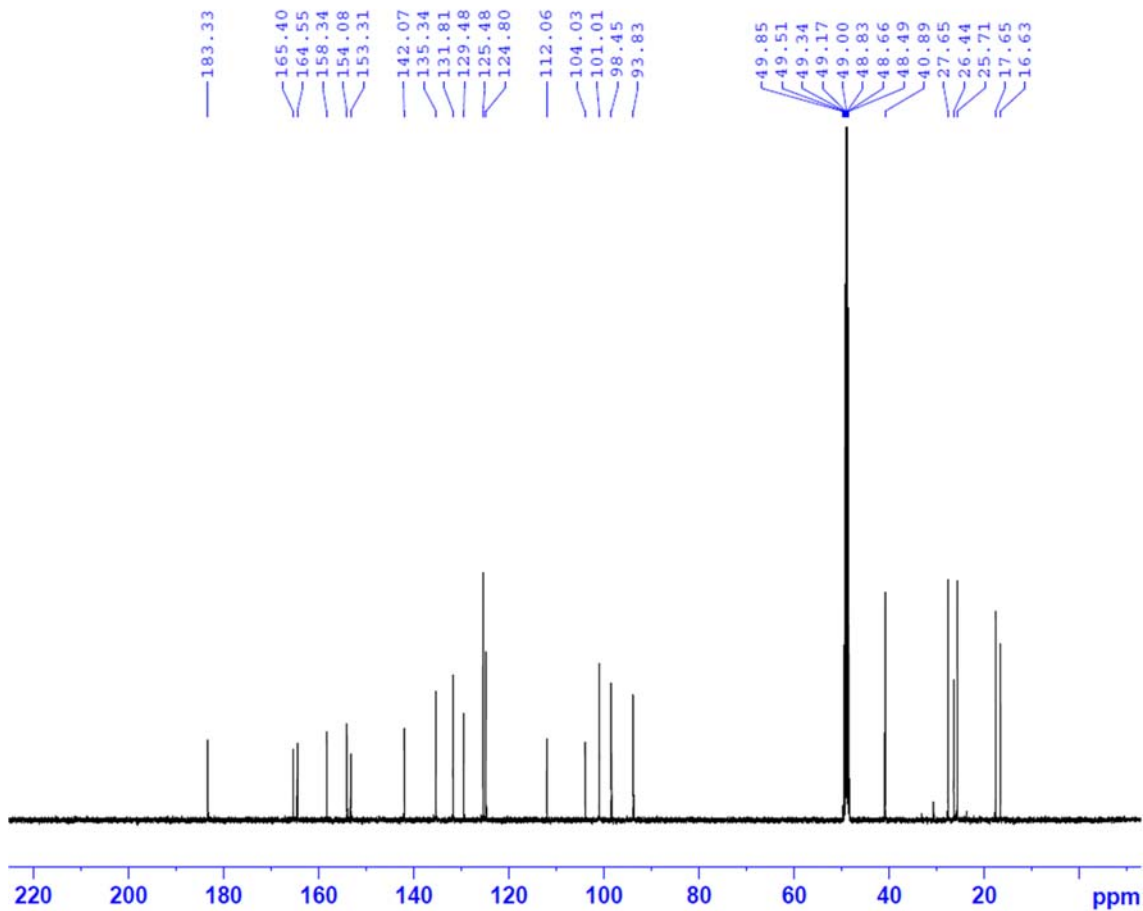

Figure S3.  $^{13}\text{C}$  NMR spectrum (in  $\text{CD}_3\text{OD}$ ) of compound **1**.

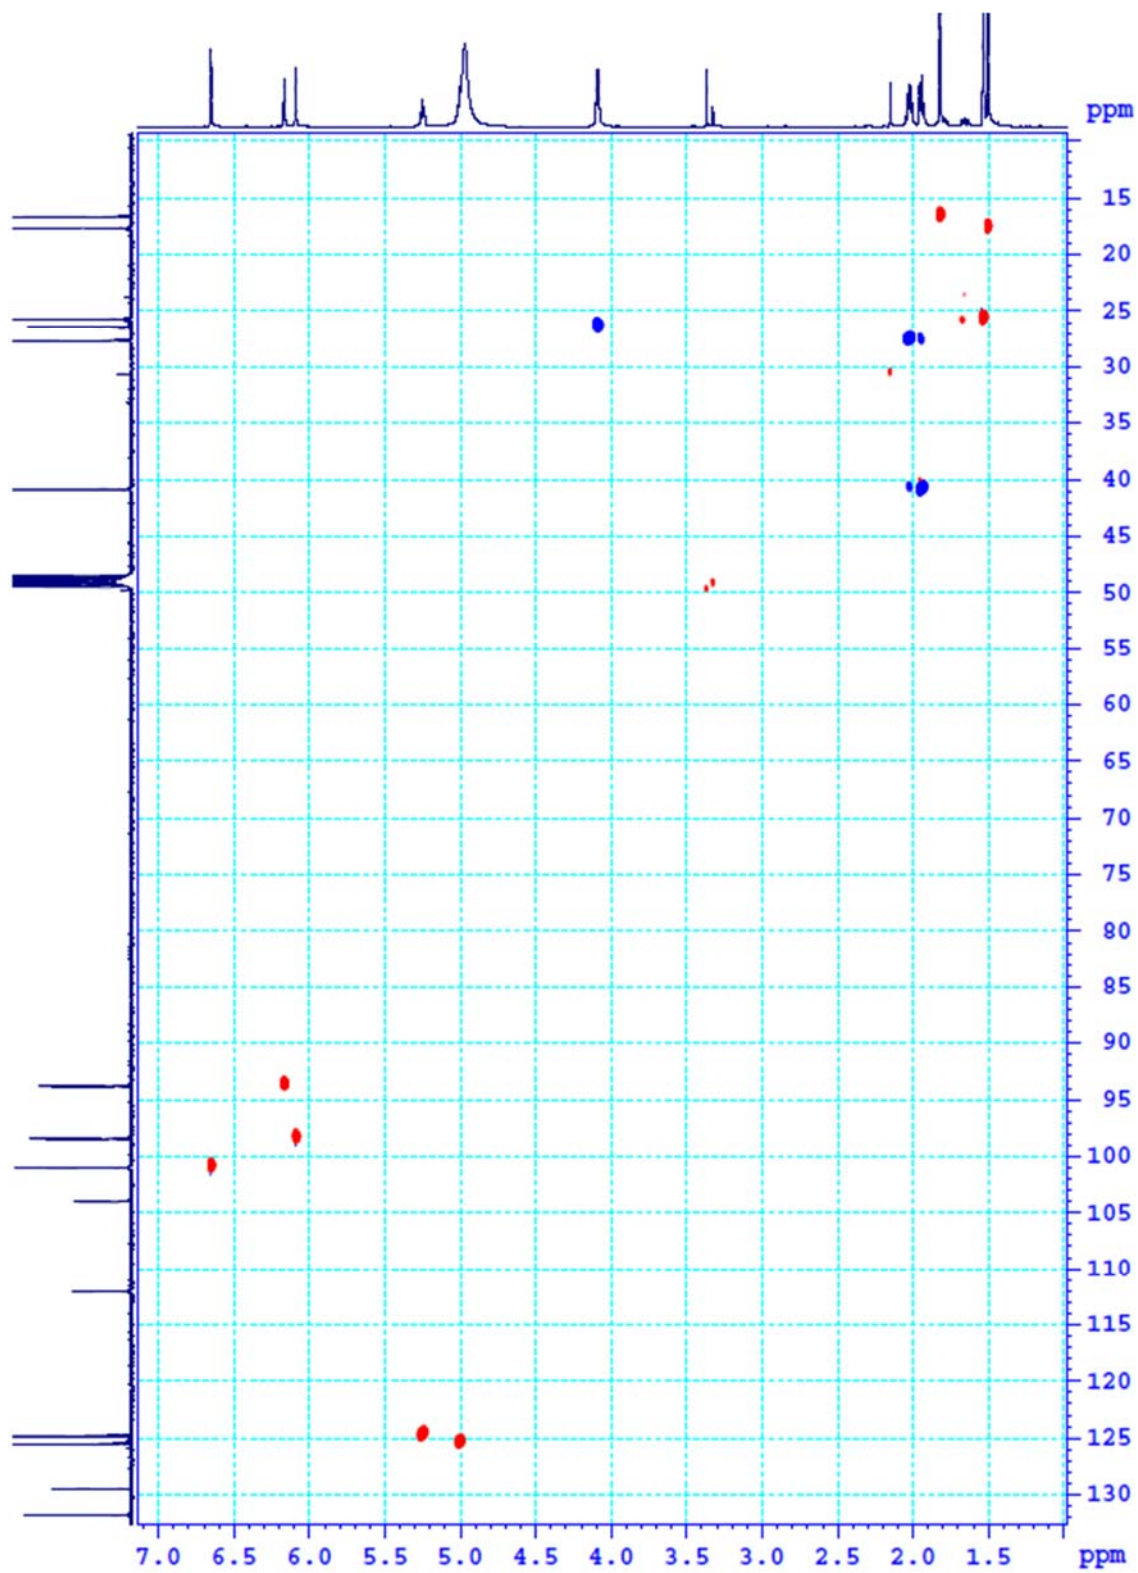

Figure S4. HSQC spectrum of compound 1.

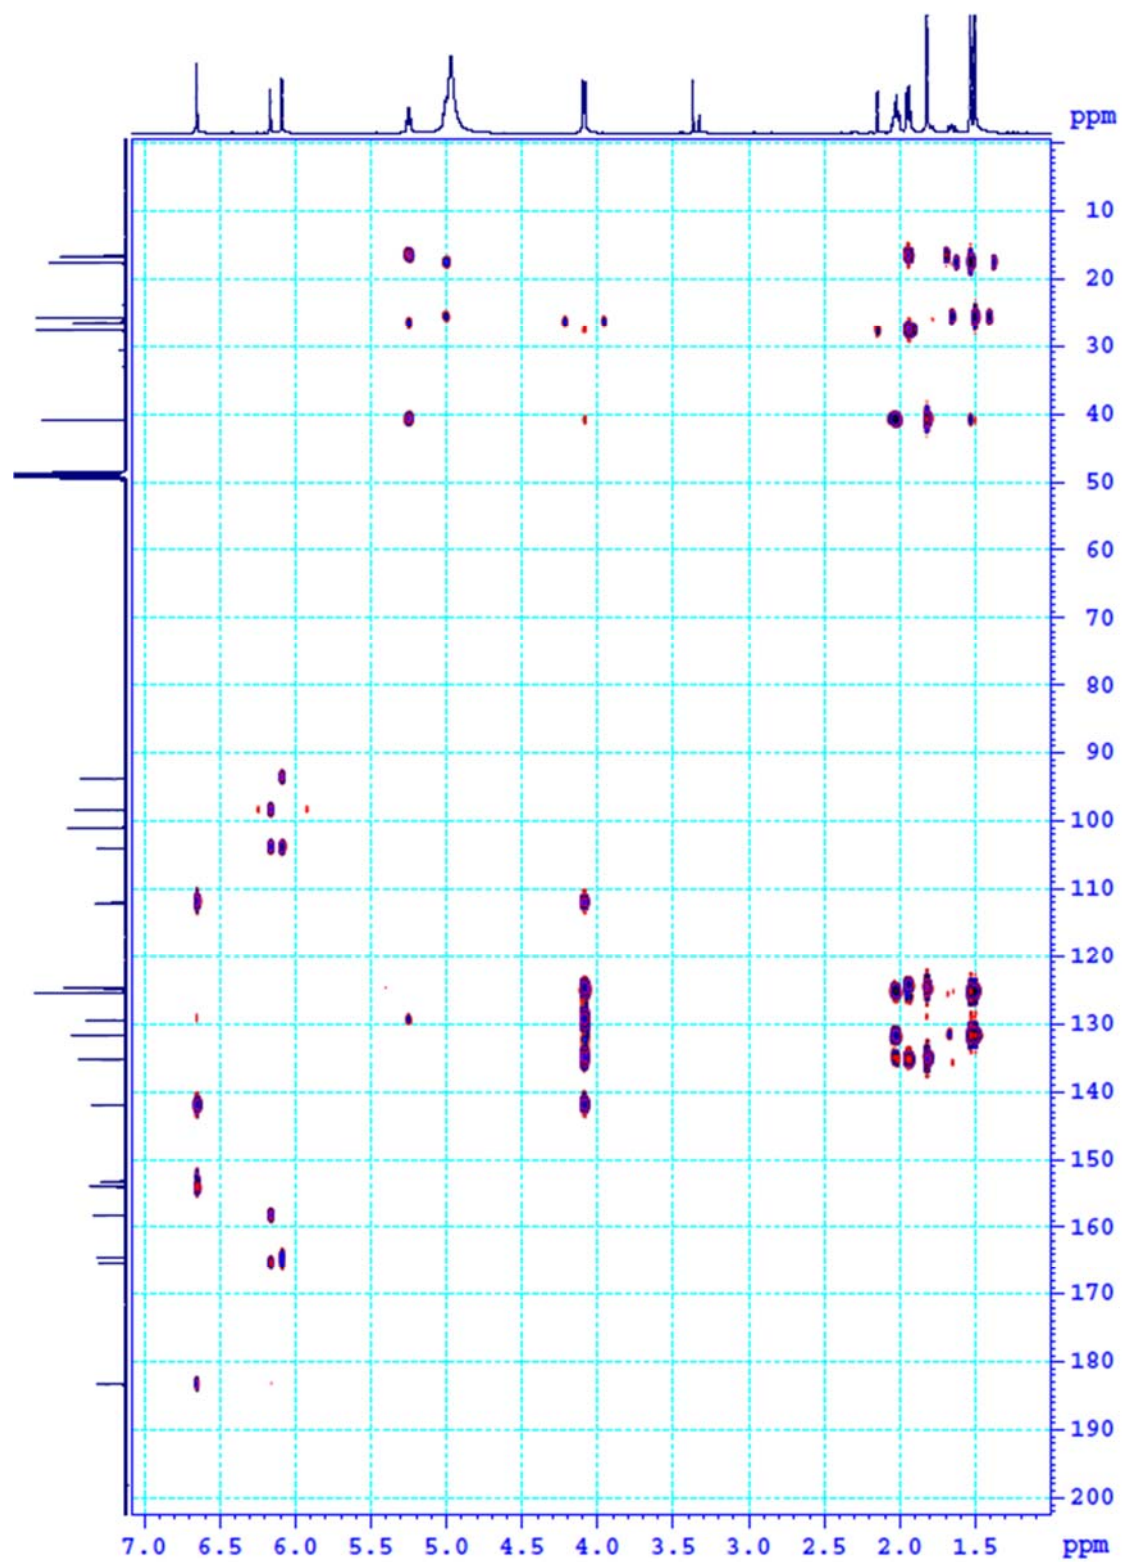

Figure S5. HMBC spectrum of compound 1.

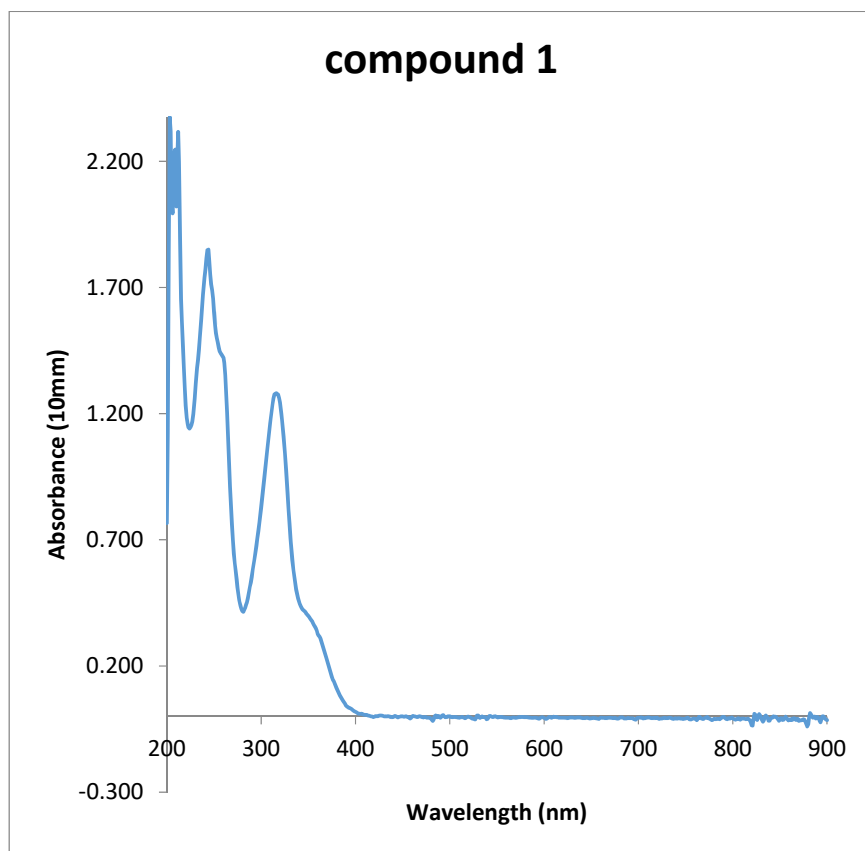

Figure S6. UV spectra of compound 1.

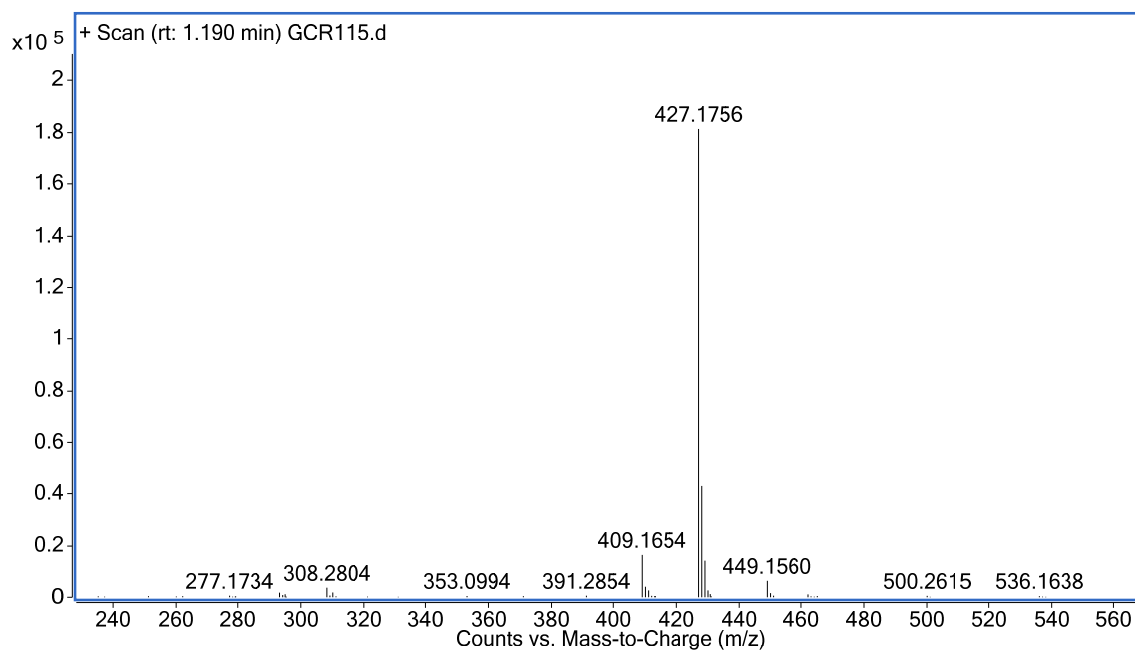

Figure S7. (+)ESI-HR-MS spectrum of compound 2.

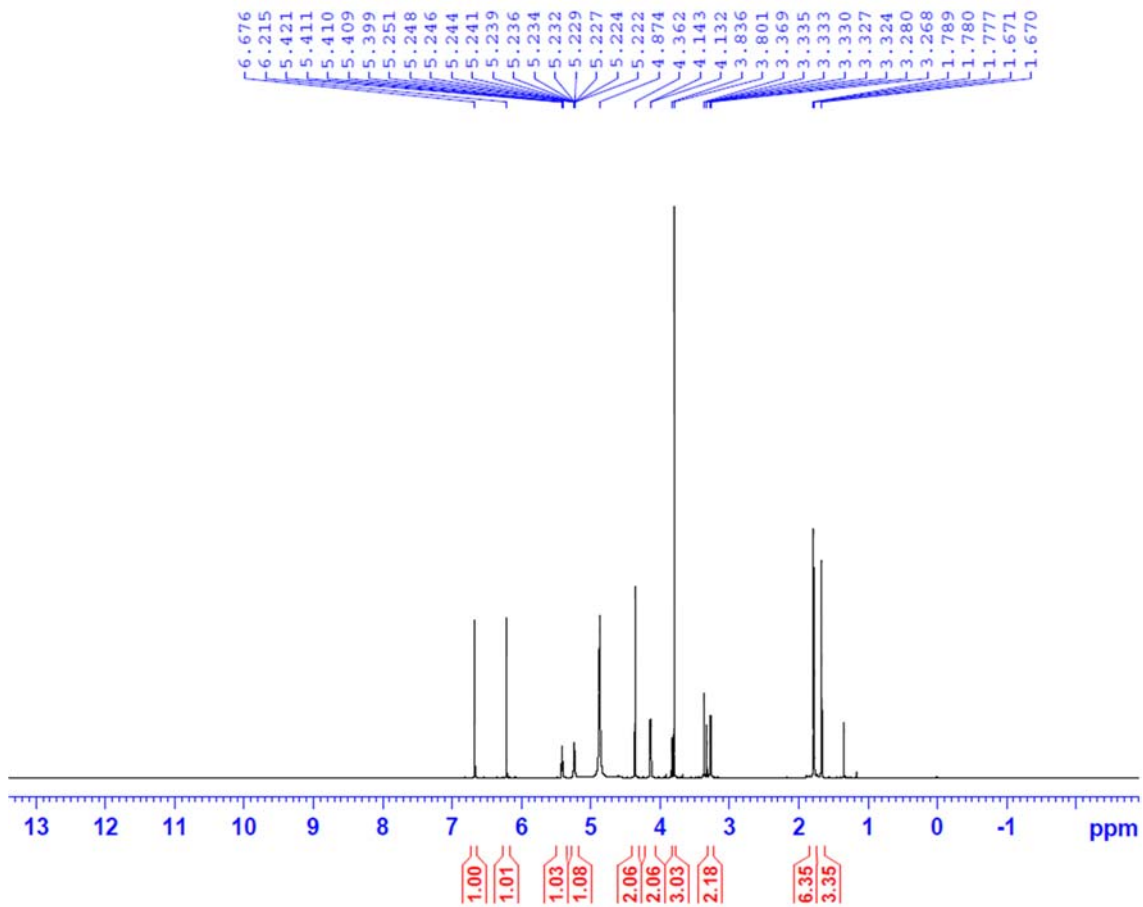

Figure S8.  $^1\text{H}$  NMR spectrum (in  $\text{CD}_3\text{OD}$ ) of compound **2**.

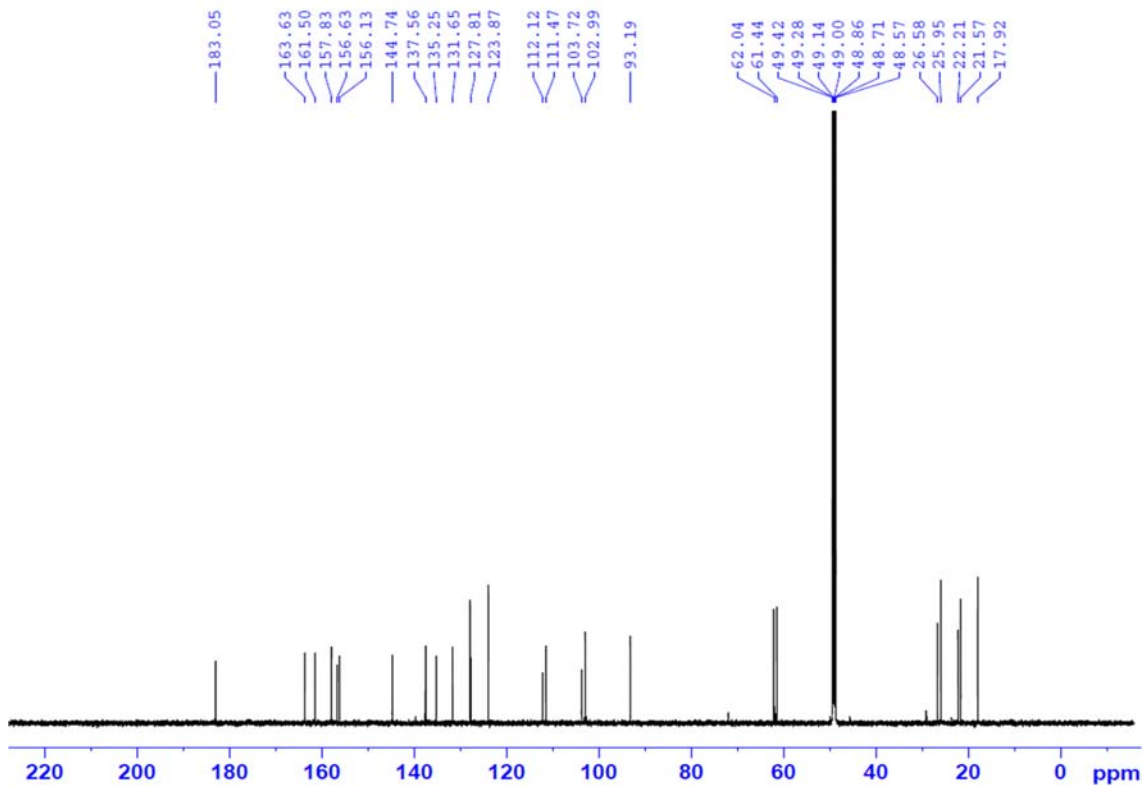

Figure S9.  $^{13}\text{C}$  NMR spectrum (in  $\text{CD}_3\text{OD}$ ) of compound **2**.

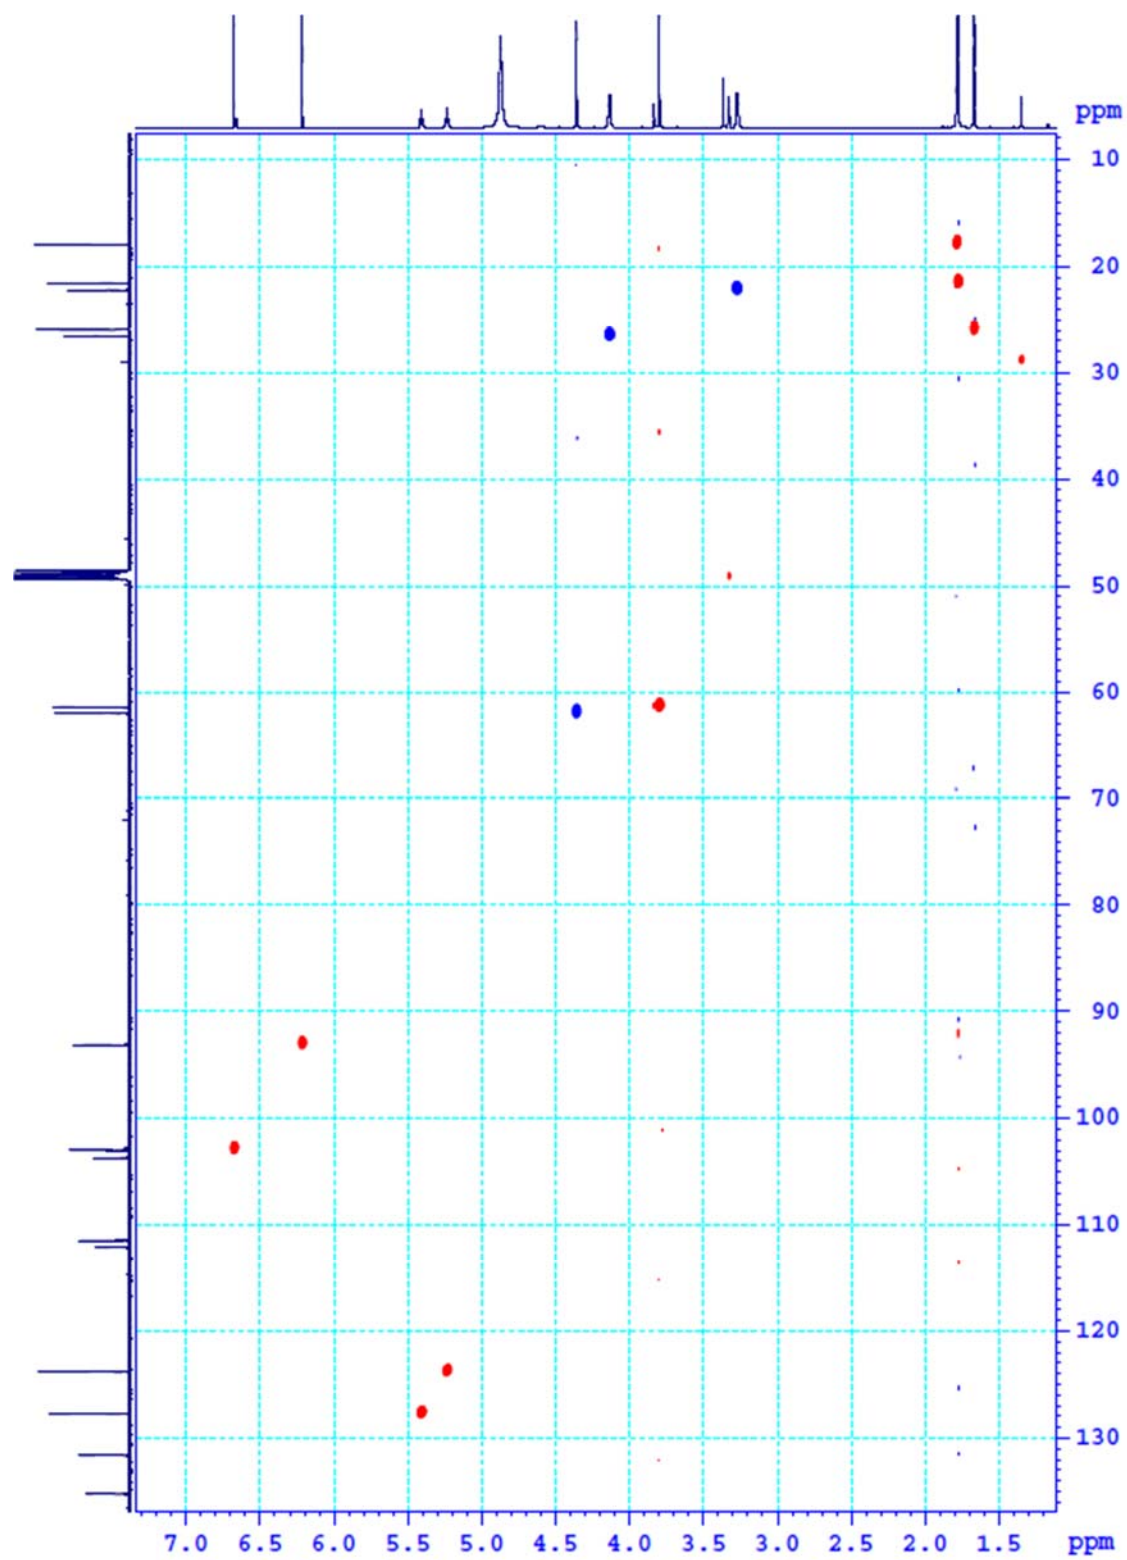

Figure S10. HSQC spectrum of compound 2.

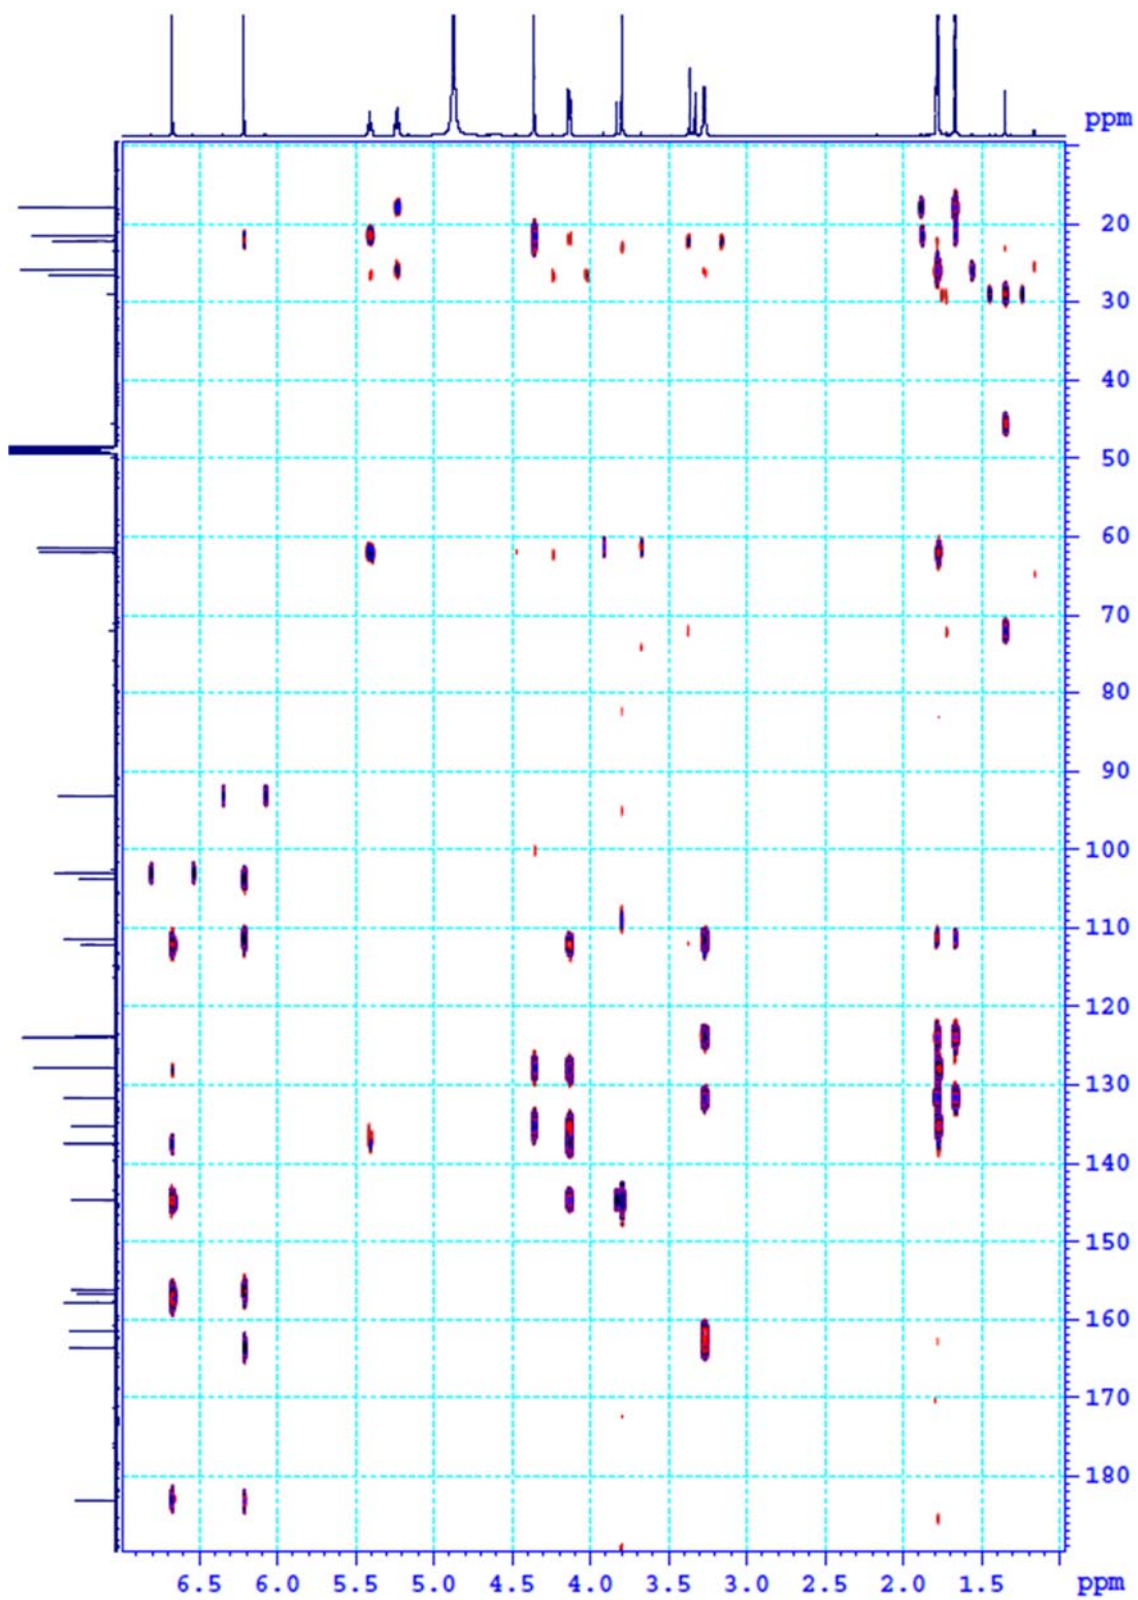

Figure S11. HMBC spectrum of compound 2.

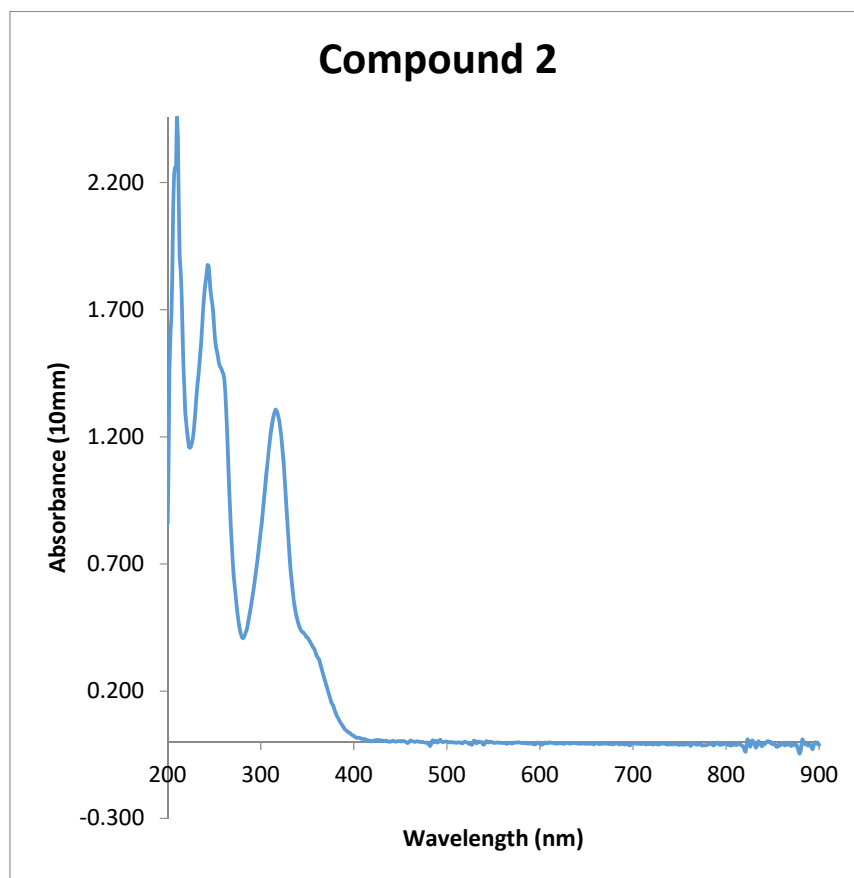

Figure S12. UV spectra of compound 2.

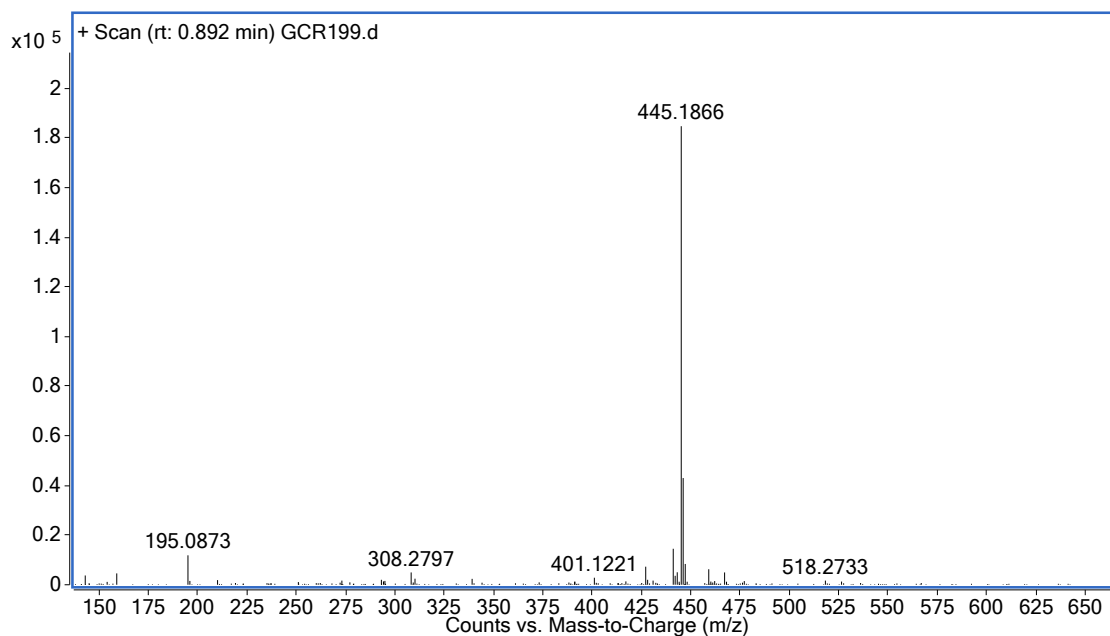

Figure S13. (+)ESI-HR-MS spectrum of compound 3.

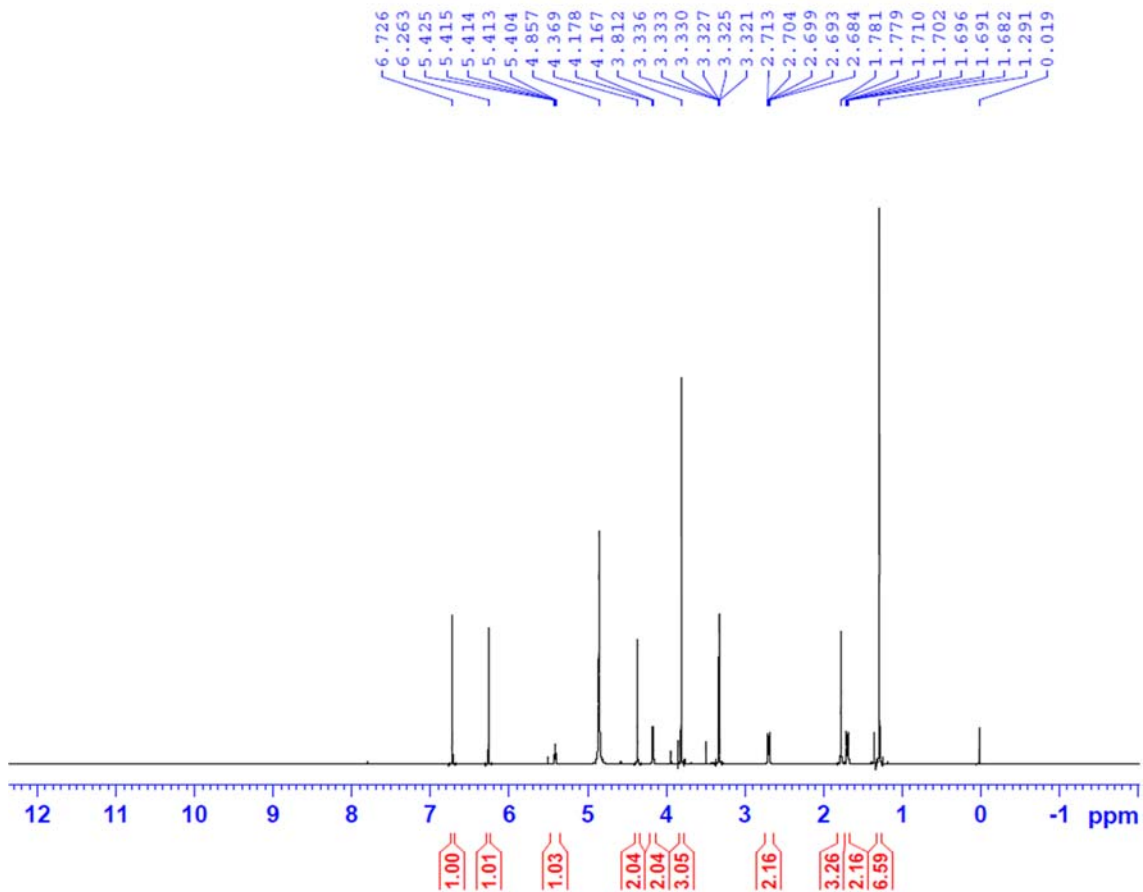

Figure S14.  $^1\text{H}$  NMR spectrum (in  $\text{CD}_3\text{OD}$ ) of compound **3**.

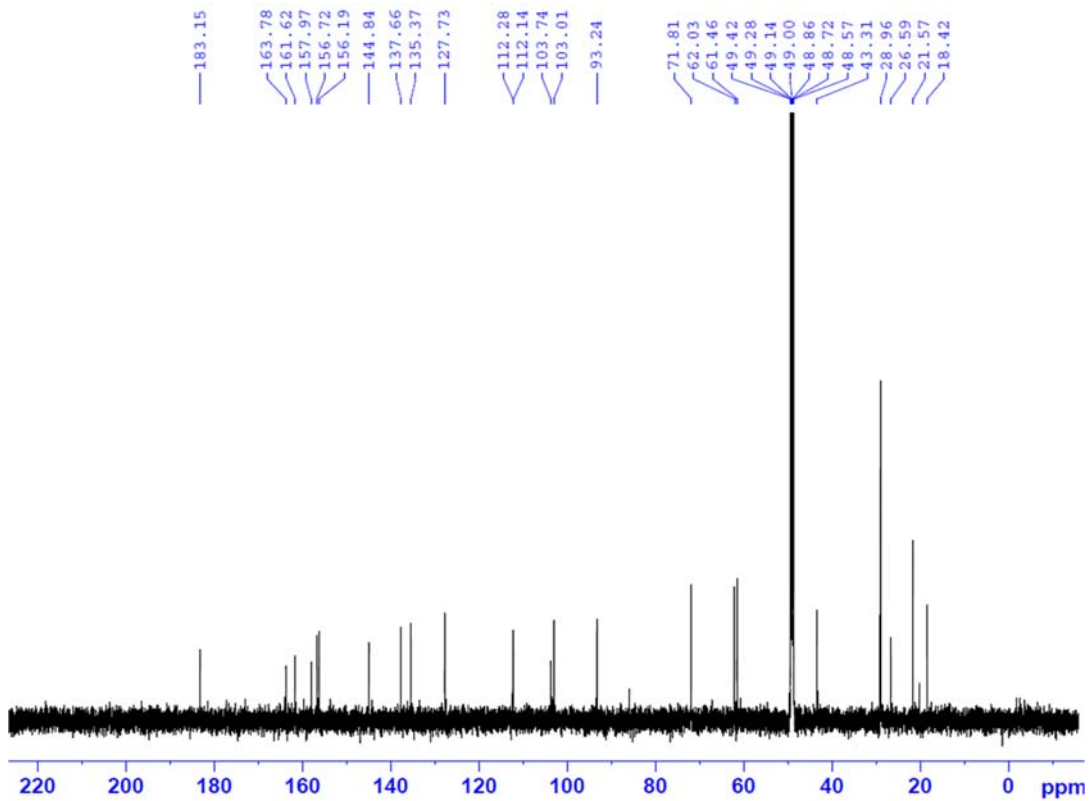

Figure S15.  $^{13}\text{C}$  NMR spectrum (in  $\text{CD}_3\text{OD}$ ) of compound **3**.

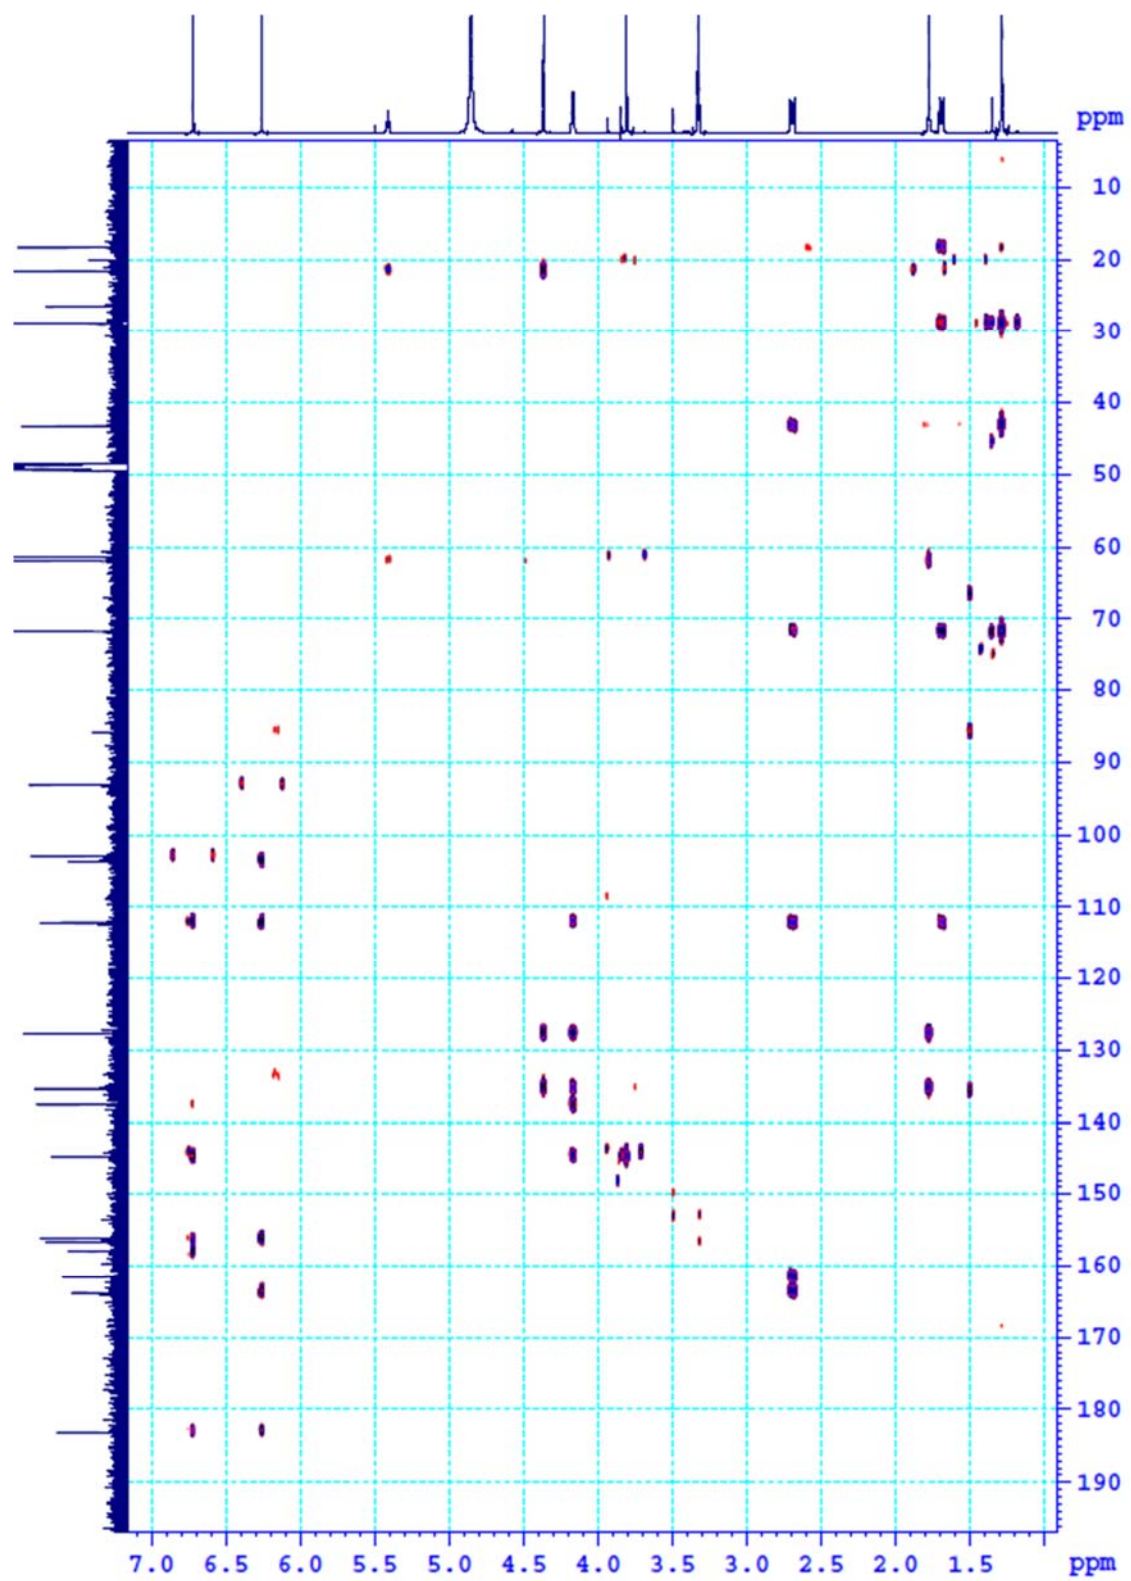

Figure S16. HMBC spectrum of compound 3.

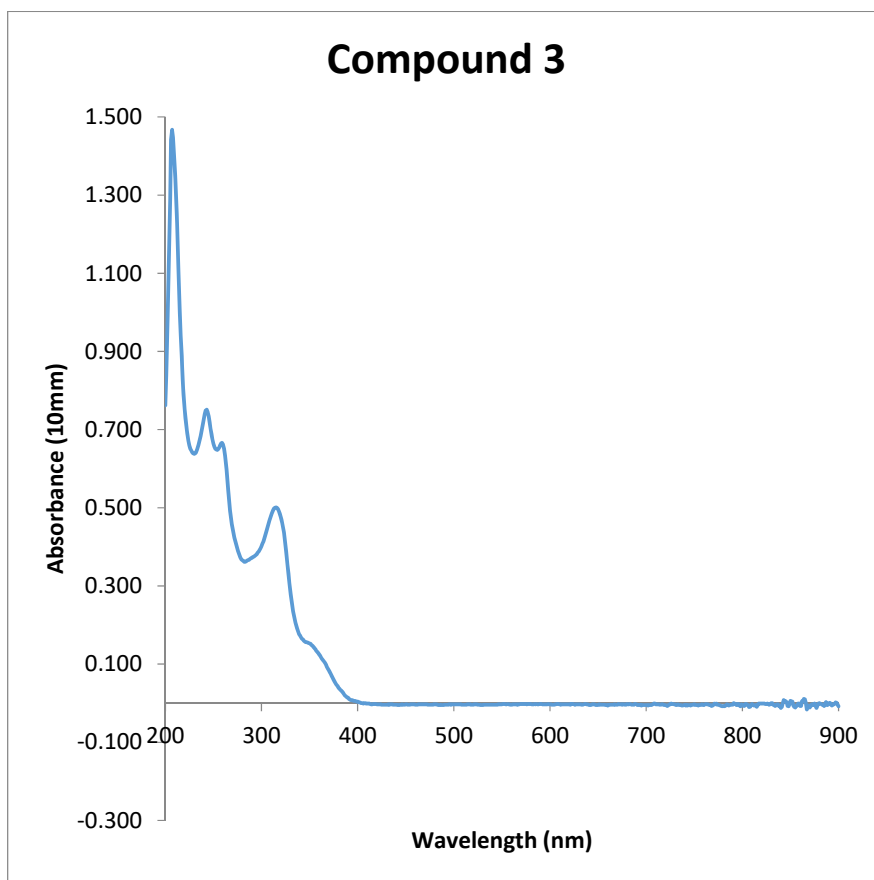

Figure S17. UV spectra of compound 3.

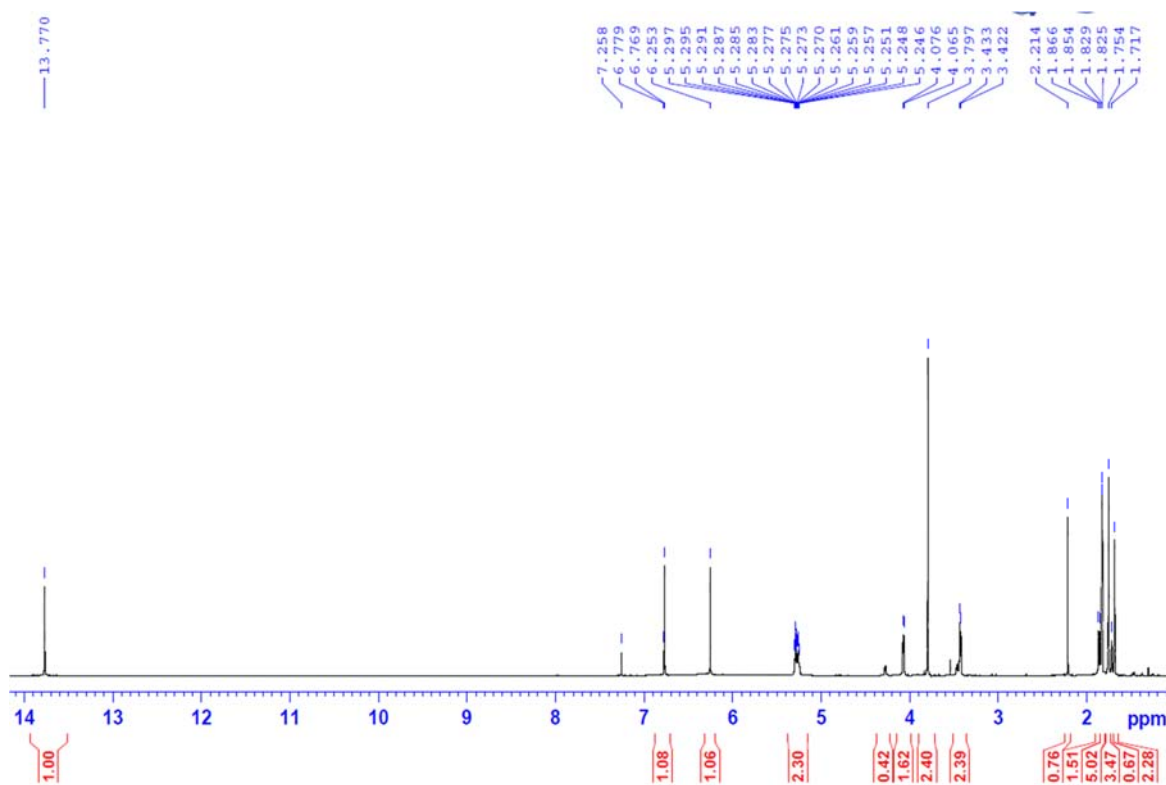

Figure S18.  $^1\text{H}$  NMR spectrum (in  $\text{CD}_3\text{OD}$ ) of compound 4.

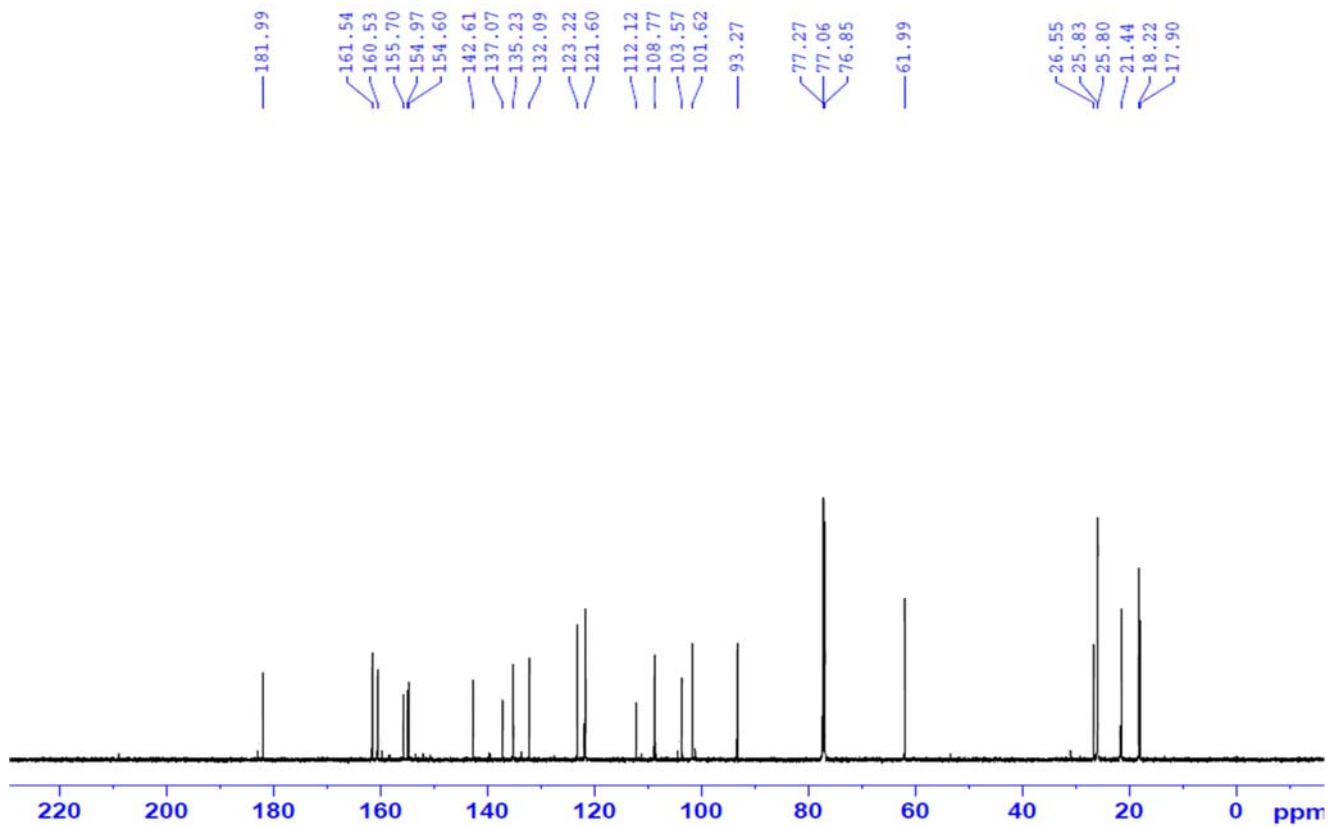

Figure S19.  $^{13}\text{C}$  NMR spectrum (in  $\text{CD}_3\text{OD}$ ) of compound 4.

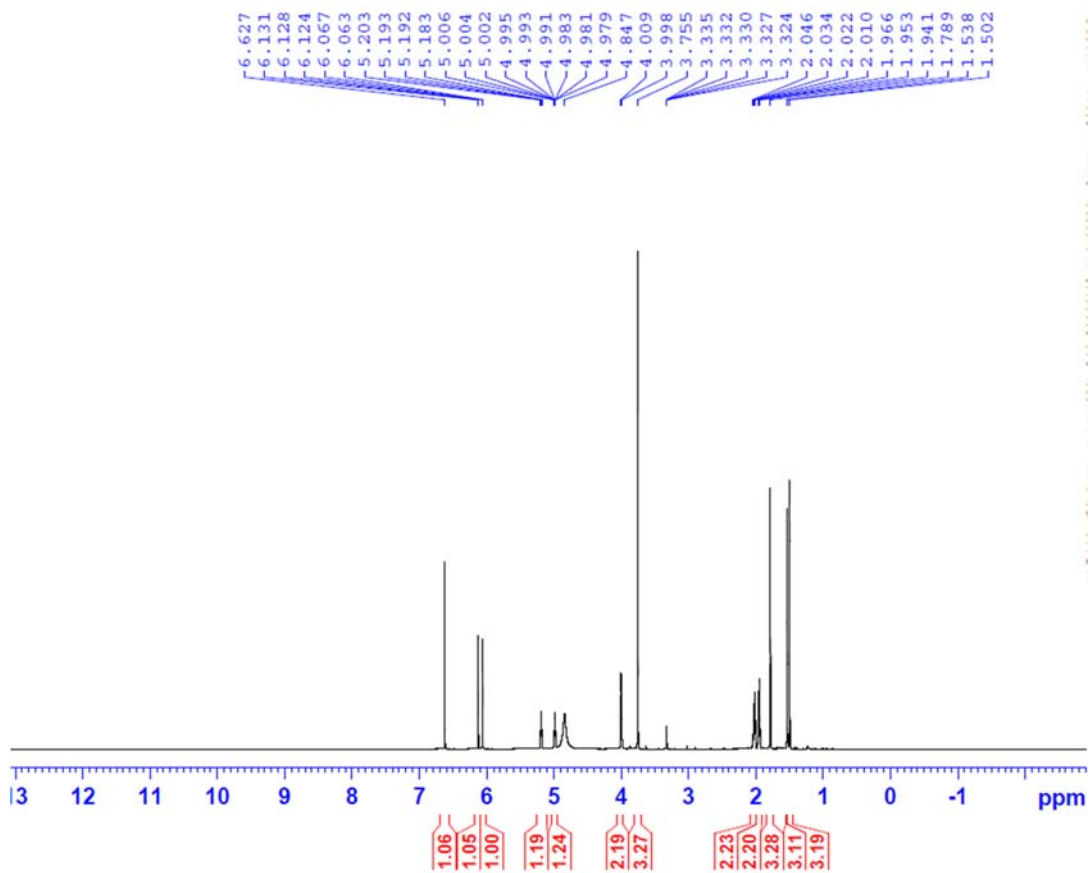

Figure S20.  $^1\text{H}$  NMR spectrum (in  $\text{CD}_3\text{OD}$ ) of compound 5.

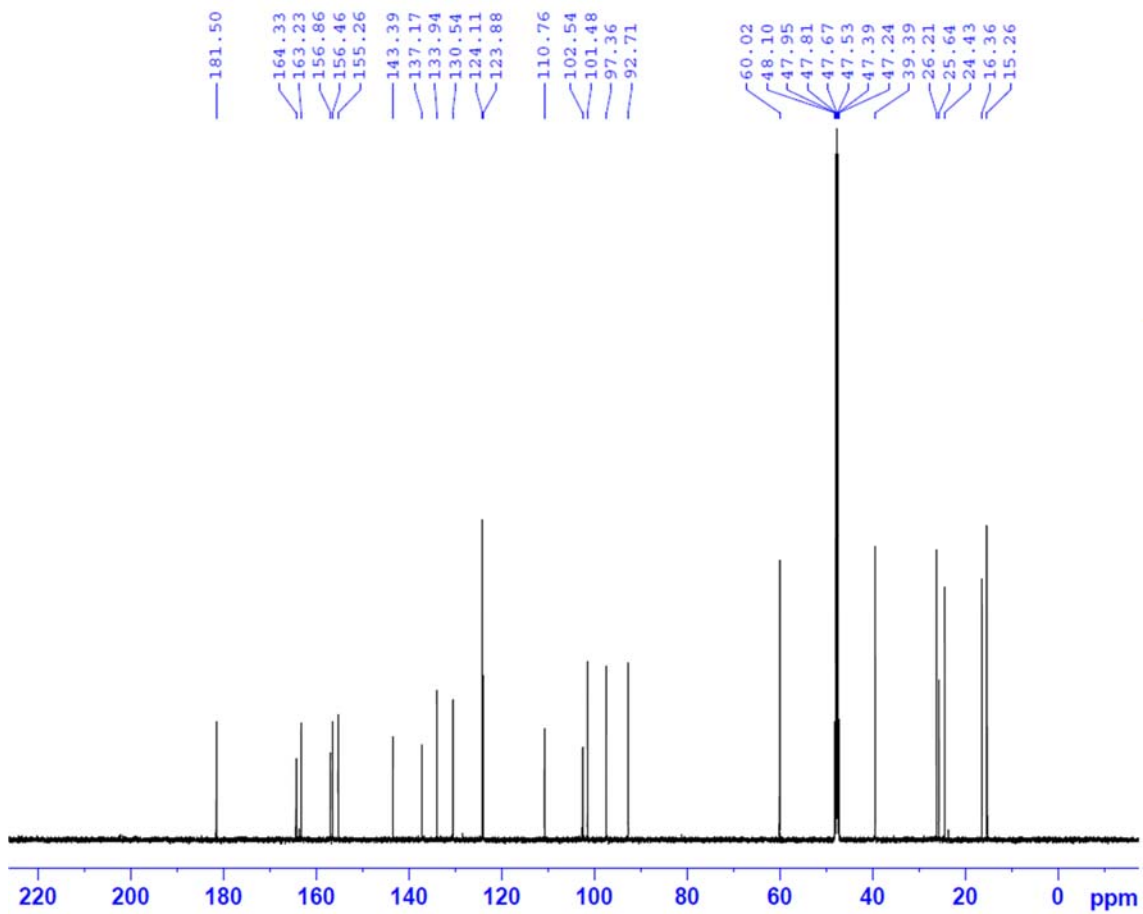

Figure S21.  $^{13}\text{C}$  NMR spectrum (in  $\text{CD}_3\text{OD}$ ) of compound **5**.

Table S1.  $\alpha$ -Glucosidase inhibition effect of compounds 1-5

| No | Compound | Concentration ( $\mu\text{g/ml}$ ) | Inhibition (%) | IC <sub>50</sub> ( $\mu\text{M}$ ) |
|----|----------|------------------------------------|----------------|------------------------------------|
| 1  | 1        | 16                                 | 86.5           | 1.62 $\pm$ 0.05                    |
|    |          | 4                                  | 74             |                                    |
|    |          | 1                                  | 67             |                                    |
|    |          | 0,25                               | 32             |                                    |
|    |          | 0,06                               | 11             |                                    |
| 2  | 2        | 16                                 | 96             | 0.94 $\pm$ 0.14                    |
|    |          | 4                                  | 90.5           |                                    |
|    |          | 1                                  | 87             |                                    |
|    |          | 0,25                               | 40.5           |                                    |
|    |          | 0,06                               | 13             |                                    |
| 3  | 3        | 16                                 | 98             | 0.43 $\pm$ 0.01                    |
|    |          | 4                                  | 95             |                                    |
|    |          | 1                                  | 93.5           |                                    |
|    |          | 0,25                               | 67,5           |                                    |
|    |          | 0,06                               | 11,5           |                                    |
| 4  | 4        | 16                                 | 95             | 0.39 $\pm$ 0.01                    |
|    |          | 4                                  | 93             |                                    |
|    |          | 1                                  | 81             |                                    |
|    |          | 0,25                               | 76.5           |                                    |
|    |          | 0,06                               | 19             |                                    |
| 5  | 5        | 16                                 | 95             | 0.56 $\pm$ 0.03                    |
|    |          | 4                                  | 83             |                                    |
|    |          | 1                                  | 75             |                                    |
|    |          | 0,25                               | 53.5           |                                    |
|    |          | 0,06                               | 8              |                                    |
| 6  | Acarbose | 256                                | 72             | 263.01 $\pm$ 10.92                 |
|    |          | 64                                 | 23             |                                    |
|    |          | 16                                 | 18             |                                    |
|    |          | 4                                  | 5              |                                    |
|    |          | 1                                  | 0              |                                    |
