# Supplementary material
Source: Research Square preprint supplement (doi:10.21203/rs.3.rs-9035742/v1)

**$\alpha$ -Glucosidase inhibitory tetraoxygenated xanthenes from the twig extract of *Garcinia cowa* Roxb. ex Choisy**

**Graphical abstract**

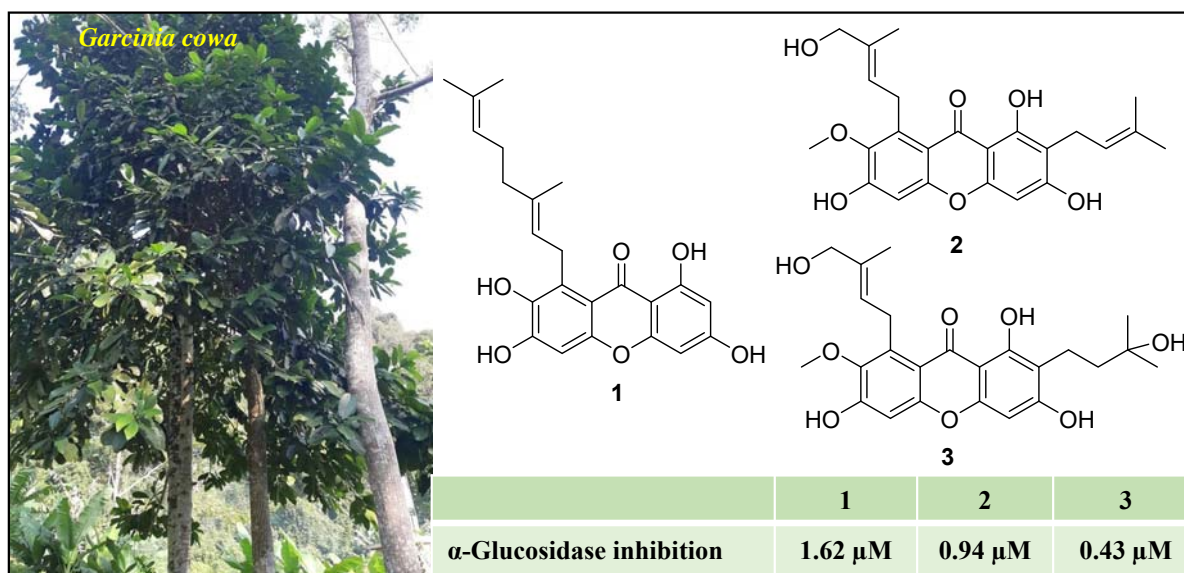

Supplement: Supplementary file 2 [file 20b7813fec918486409c1f79.pdf]
