# Supplementary material
Source: Research Square preprint supplement (doi:10.21203/rs.3.rs-9035742/v1)
Supplement: Supplementary file 3 [file f3a3eb035c795f387c3e23a1.docx]

Supplementary Information Supplementary material of this paper is available online comprising HRMS, NMR and UV (spectra) of isolated compounds and their *α*-glucosidase inhibition data.
